# Supplementary material
Source: MDPI journal article supplement (https://www.mdpi.com/2411-5150/7/1/11)
Supplement: s1 [file s1]

# The differential contribution of macular pigments and foveal anatomy to the perception of Maxwell's spot and Haidinger's brushes

Gary P Misson, Rebekka Heitmar, Richard Armstrong and Stephen J Anderson.

## Supplementary Tables

**Table S1.** Pearson correlation coefficients of macular pigment / foveolar measurements (X variables). Parameter definitions as in Table 1. Values with a significance level of  $p < 0.05$  are underlined. Note high degree of intercorrelation within each macular pigment and foveolar measurement group (shaded areas) with less intercorrelation between groups (boxed area).

|        | MPVc         | MPV1        | MPV2        | MPV6        | MPr0.2     | Ft           | Fr          | Ph   |
|--------|--------------|-------------|-------------|-------------|------------|--------------|-------------|------|
| MPV1   | <u>0.85</u>  |             |             |             |            |              |             |      |
| MPV2   | <u>0.69</u>  | <u>0.94</u> |             |             |            |              |             |      |
| MPV6   | <u>0.68</u>  | <u>0.9</u>  | <u>0.95</u> |             |            |              |             |      |
| MPr0.2 | <u>0.57</u>  | <u>0.86</u> | <u>0.96</u> | <u>0.91</u> |            |              |             |      |
| Ft     | <u>0.52</u>  | <u>0.28</u> | 0.09        | 0.08        | -0.02      |              |             |      |
| Fr     | -0.24        | -0.03       | 0.13        | 0.04        | 0.22       | <u>-0.52</u> |             |      |
| Ph     | <u>-0.36</u> | -0.06       | 0.19        | 0.13        | <u>0.3</u> | <u>-0.73</u> | <u>0.52</u> |      |
| Pr     | -0.04        | 0.08        | 0.06        | 0.04        | 0.09       | <u>-0.32</u> | 0.24        | 0.13 |

**Table S2.** Multiple regression (conventional method).

| Y                                                                                           | R    | R <sup>2</sup> | F     | DF    | p      |
|---------------------------------------------------------------------------------------------|------|----------------|-------|-------|--------|
| <b>MSr</b>                                                                                  | 0.78 | 0.60           | 6.19  | 10,37 | <0.000 |
| (Significant X variables: MPr0.2 $\beta = 1.56$ )                                           |      |                |       |       |        |
| <b>HBr</b>                                                                                  | 0.85 | 0.72           | 10.04 | 9.36  | <0.000 |
| (significant X variables: Ft, $\beta = 0.546$ ; Fr, $\beta = 0.470$ ; Ph, $\beta = 0.618$ ) |      |                |       |       |        |

**Table S3.** Multiple regression (stepwise forward method).

| <b>Y variable</b> | <b>X selected</b> | <b>Rank</b> | <b>Multiple R</b> | <b>R<sup>2</sup></b> | <b>R<sup>2</sup> change</b> | <b>F to enter/exclude</b> | <b>p</b> |
|-------------------|-------------------|-------------|-------------------|----------------------|-----------------------------|---------------------------|----------|
| MSr               | MPr0.2            | 1           | 0.69              | 0.47                 | 0.47                        | 38.9                      | <0.000   |
|                   | MPV2              | 2           | 0.74              | 0.55                 | 0.08                        | 7.3                       | <0.009   |
| HBr               | MPr0.2            | 1           | 0.60              | 0.36                 | 0.36                        | 24.9                      | <0.000   |
|                   | Fr                | 2           | 0.74              | 0.55                 | 0.19                        | 17.7                      | <0.000   |
|                   | Pr                | 3           | 0.78              | 0.61                 | 0.06                        | 6.4                       | 0.015    |
|                   | Ft                | 4           | 0.84              | 0.70                 | 0.07                        | 9.2                       | 0.004    |
